# Supplementary material for: A nanofiber hydrogel derived entirely from ocean biomass for wound healing
Source: Royal Society of Chemistry journal article supplement (doi:10.1039/d2na00535b), 2022-11-09
Supplement: d2na00535b1.pdf [file d2na00535b1.pdf]

## Supporting information

### **A nanofiber hydrogel derived entirely from ocean biomass for wound healing**

*Tian-Cai Sun<sup>a</sup>, Bing-Yu Yan<sup>a</sup>, Xu-Chao Ning<sup>b</sup>, Zhi-Yue Tang<sup>a</sup>, Chao Hui<sup>a</sup>, Mao-zhi  
Hu<sup>c</sup>, Seeram Ramakrishna<sup>d</sup>, Yun-Ze Long<sup>a,\*</sup>, Jun Zhang<sup>a,\*</sup>*

<sup>a</sup> Collaborative Innovation Center for Nanomaterials & Devices, College of Physics,  
Qingdao University, Qingdao 266071, P. R. China

<sup>b</sup> Medical College, Qingdao University, Qingdao 266071, P. R. China

<sup>c</sup> Equipment Division, Qingyun County People's Hospital, Dezhou 253000, P. R.  
China

<sup>d</sup> Center for Nanofibers & Nanotechnology, Department of Mechanical Engineering,  
National University of Singapore, Singapore 117574, Singapore

-----  
\* Corresponding Authors

E-mail:yunze.long@qdu.edu.cn (Y. Z. Long)

iamjunzhang@163.com (J. Zhang)

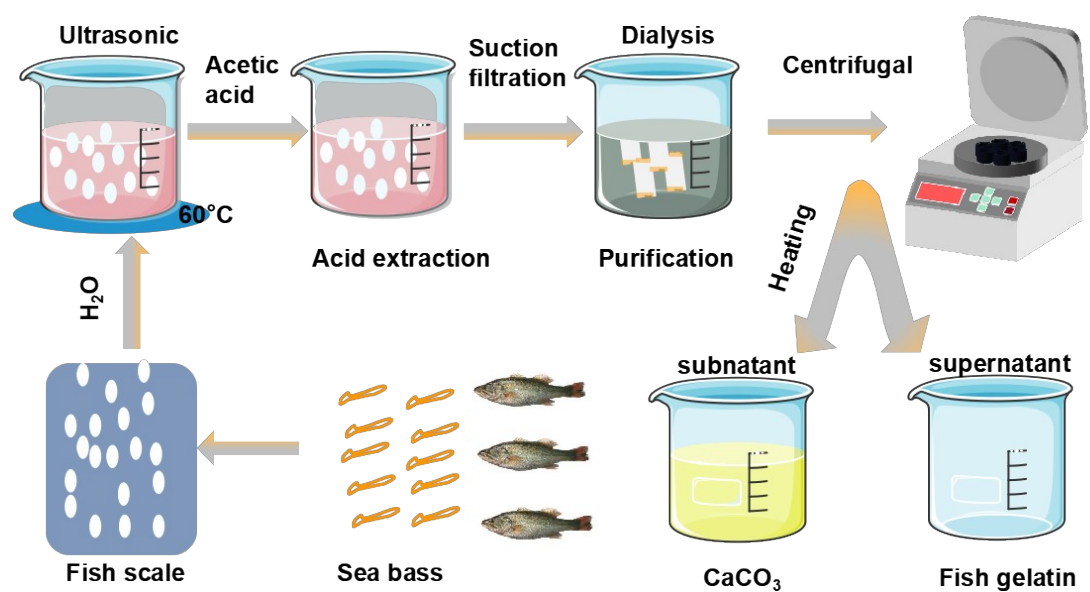

**Fig.S1** Extraction and purification of collagen and  $\text{CaCO}_3$  from fish scales of sea bass.

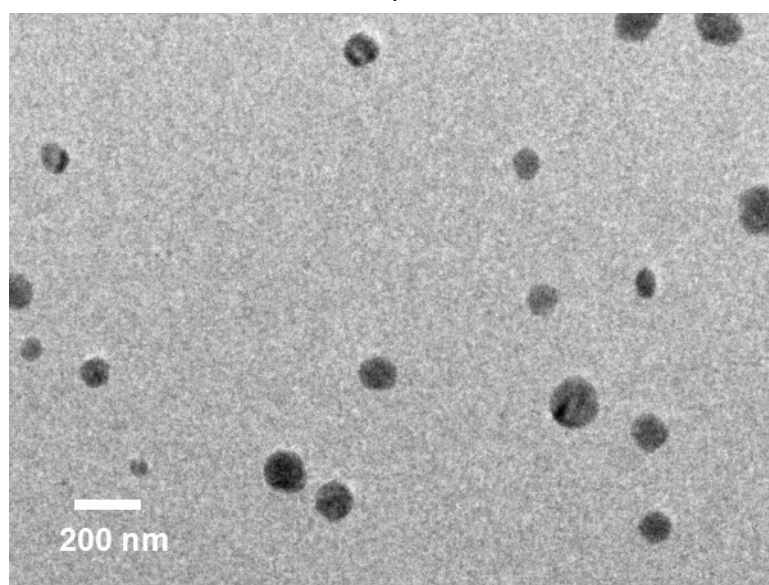

**Fig.S2** SEM image of the synthesis of  $\text{CuS}$  at nanometer level.

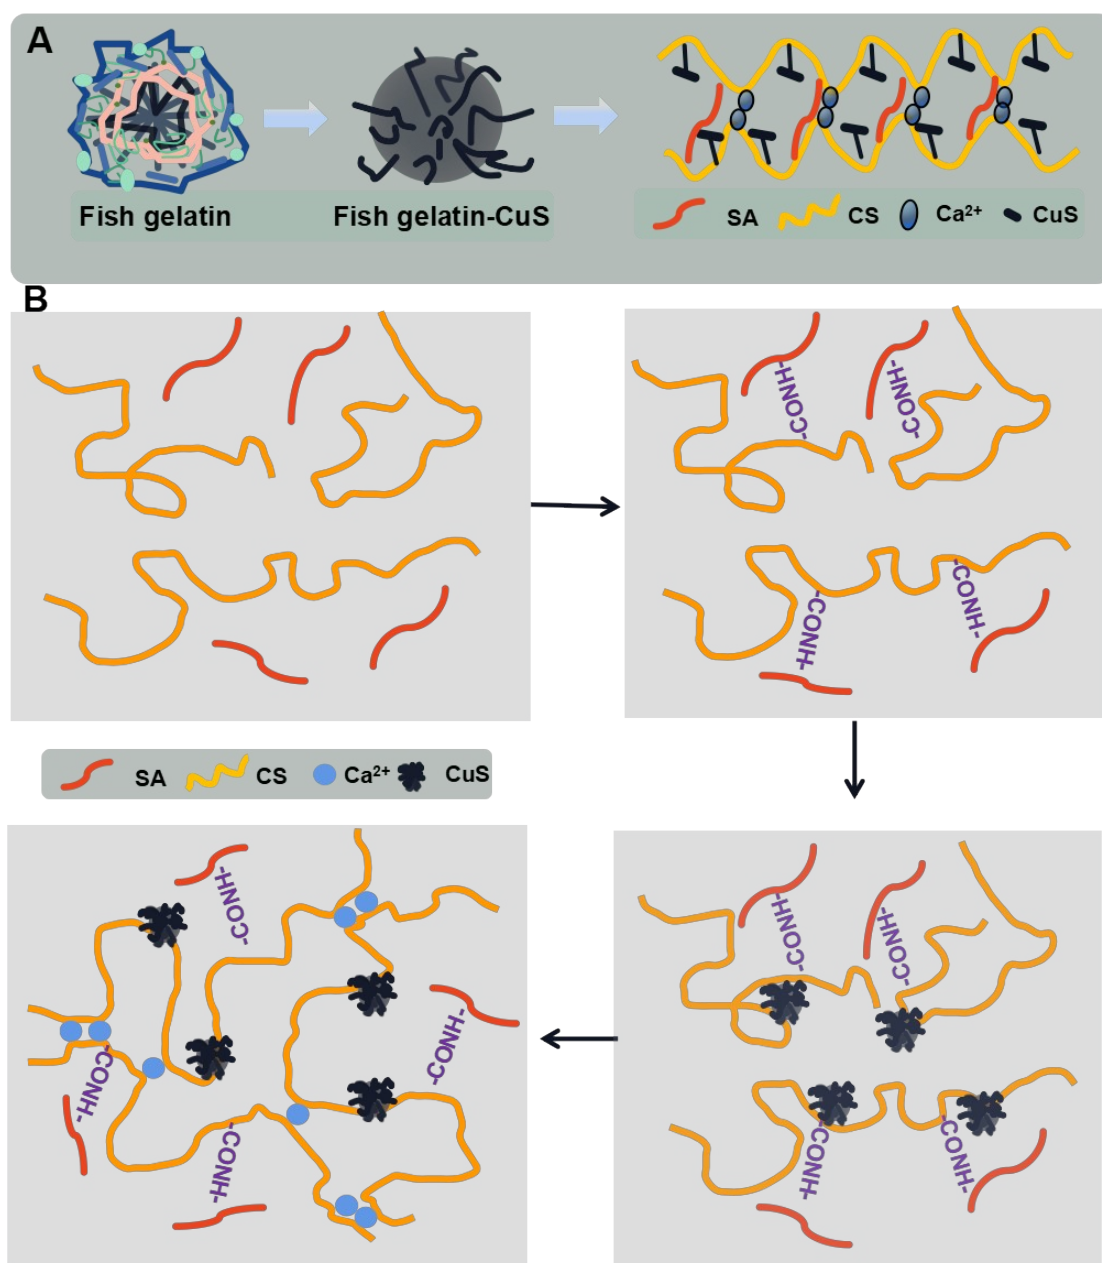

**Fig.S3** A) The extracted CuS was used to promote the fiber hydrogel crosslinking schematic.B) Cross-linking mechanism of FS-P hydrogel.

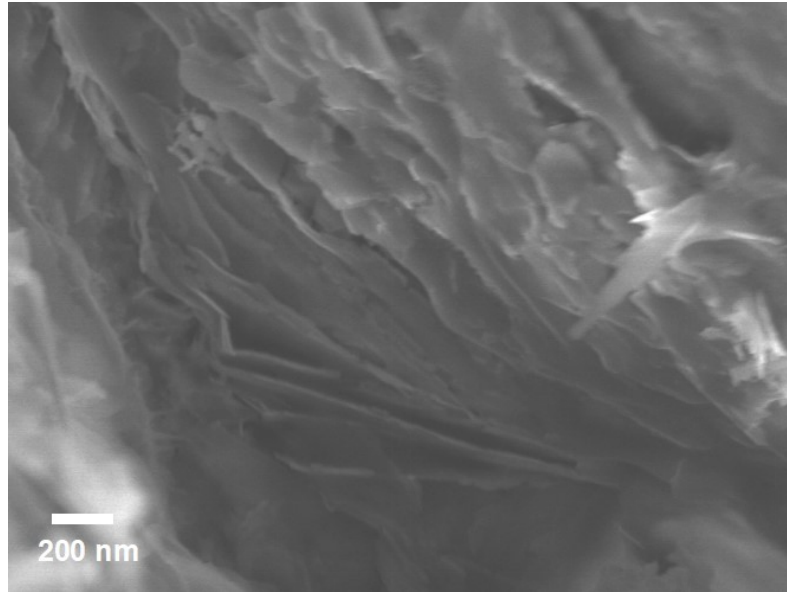

**Fig.S4** The FS-P prepared without the process of spinning fibers.

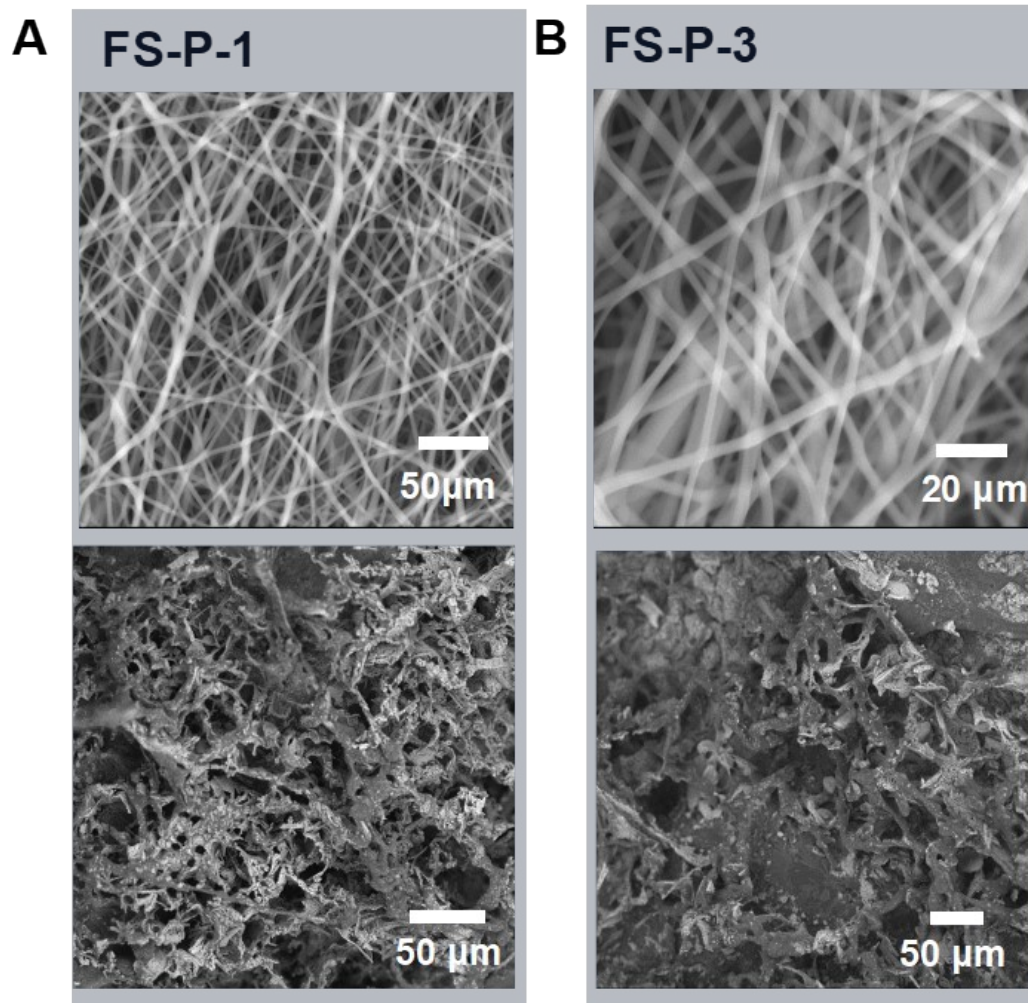

**Fig.S5** SEM images of FS-P-1 A) and FS-P-3 B) in nanofiber form and hydrogel form.

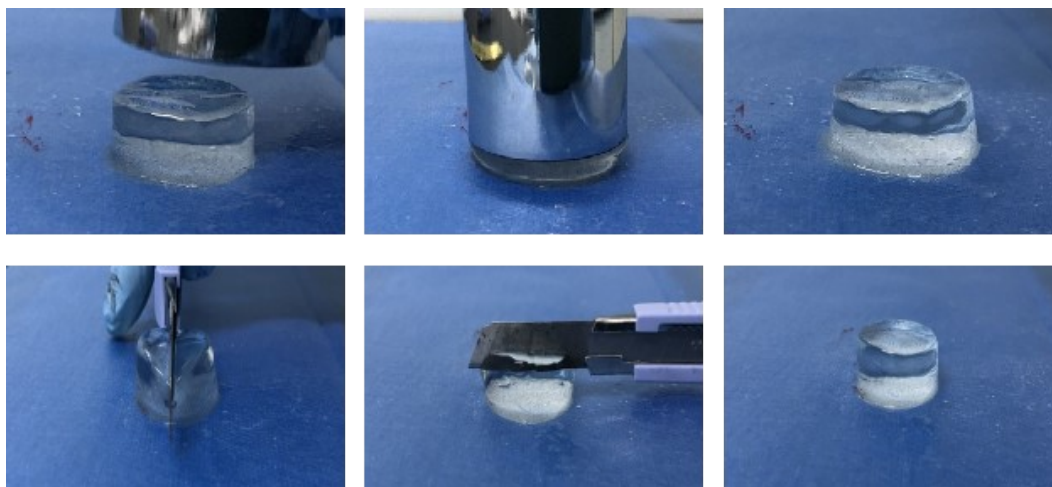

**Fig.S6** Photo of FS-P hydrogel after heavy compression and knife cutting.

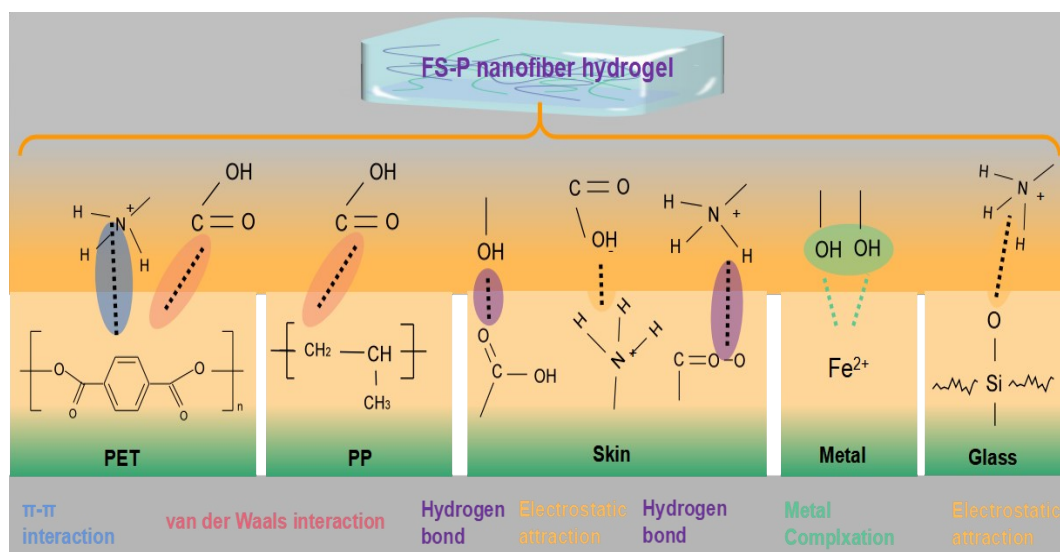

**Fig.S7** Mechanism diagram of FS-P hydrogel adhesion to various materials.

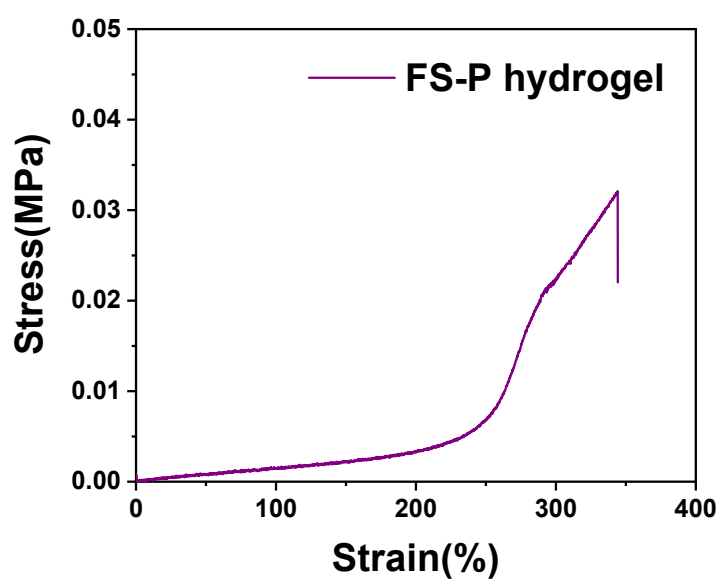

**Fig.S8** Shear-tension curve of FS-P hydrogel with pig skin.

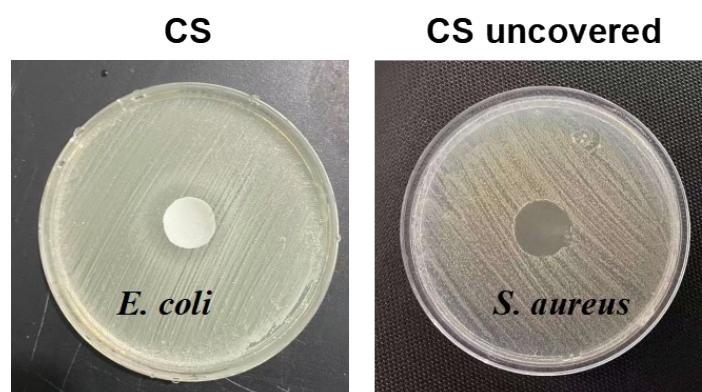

**Fig.S9** After treatment with a pure CS film for 24 hours, the film was uncovered, the bacteria situation of on the agar plate were observed.

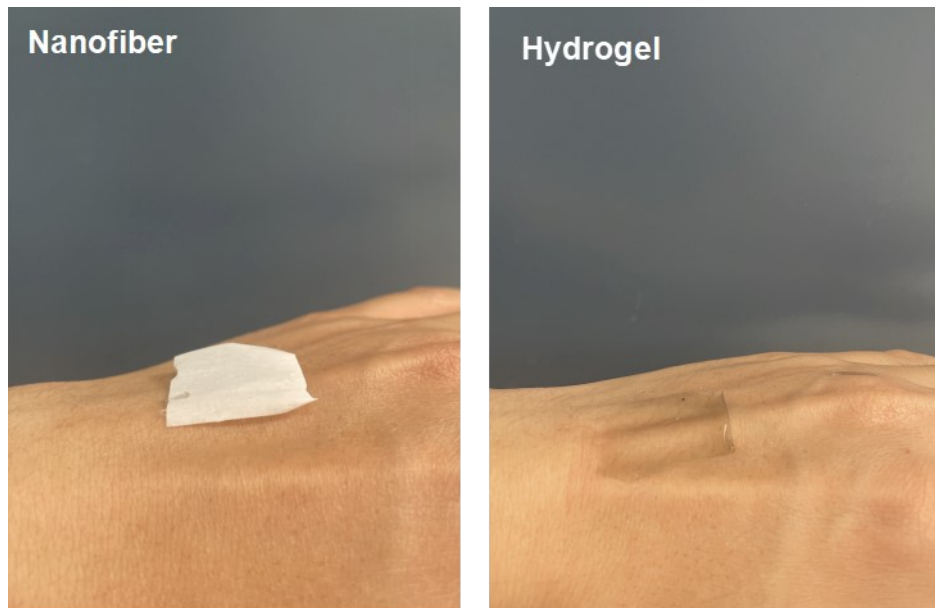

**Fig.S10** Photo of the bonding effect of nano-fiber and hydrogel.

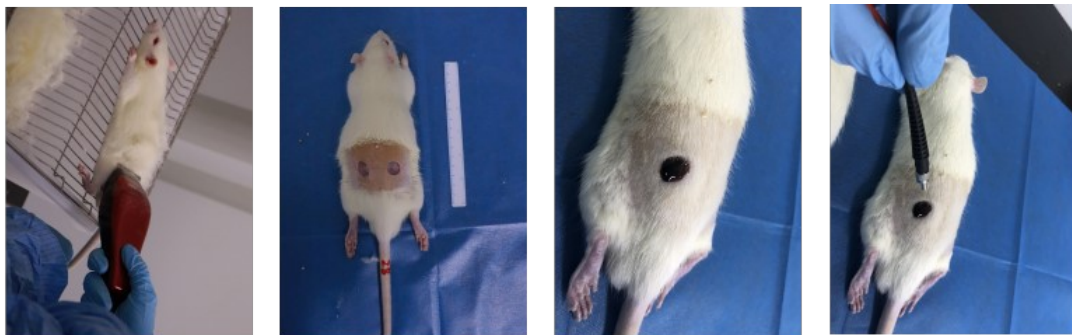

**Hair removal** ➡ **Wound infection** ➡ **FG-CuS soak** ➡ **Laser irradiation**

**Fig.S11** Animal experiment processing steps.

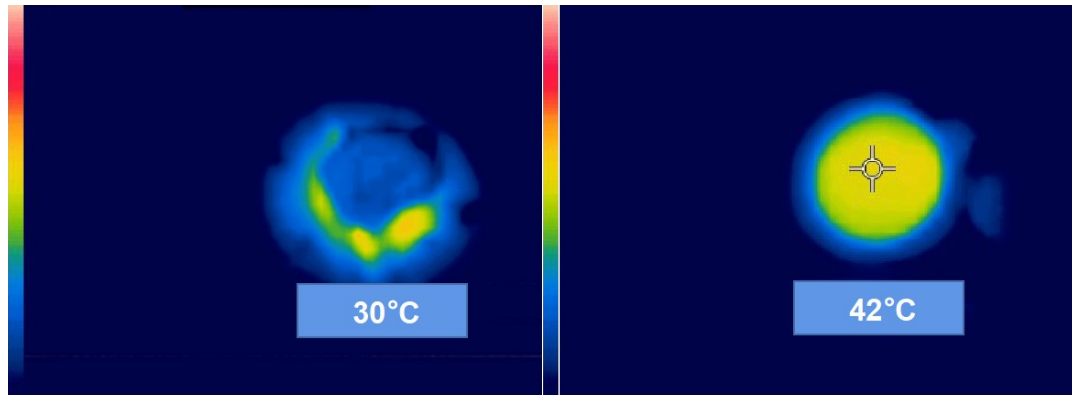

**Fig.S12** The thermal imager recorded the temperature change of a laser irradiation.

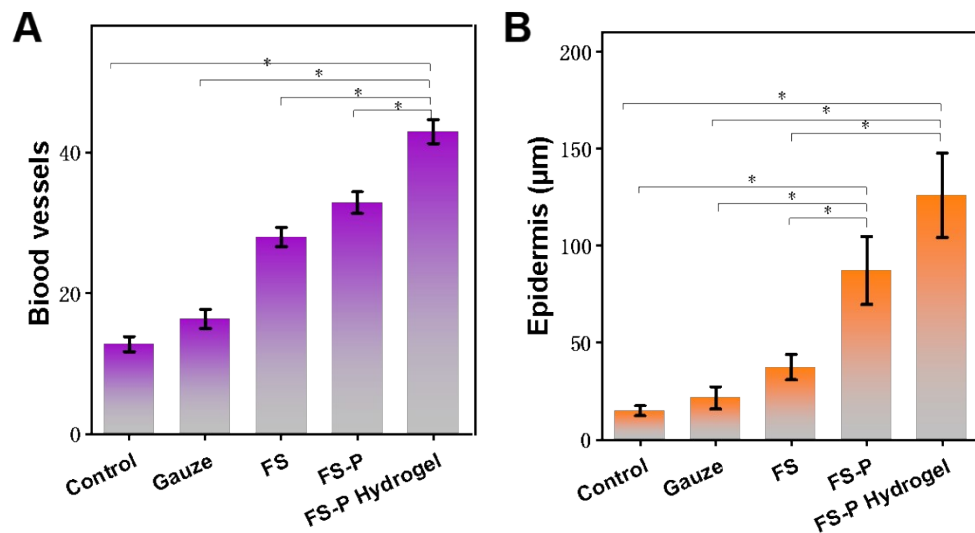

**Fig.S13** Tissue blood vessels A) and Epidermal B) statistics were treated in different ways on day 7 (n=3, \* P < 0.05, \*\* P < 0.01).

Table S1 Abbreviation, composition and Proportion of SA:CS in FS-P hydrogel.

| Abbreviation | Chemical composition                      | Proportion<br>SA:CS |
|--------------|-------------------------------------------|---------------------|
| FS-P-1       | Sodium alginate/Chitosan/Fish gelatin/CuS | 10:1                |
| FS-P-2       | Sodium alginate/Chitosan/Fish gelatin/CuS | 10:2                |
| FS-P-3       | Sodium alginate/Chitosan/Fish gelatin/CuS | 10:3                |
